# Supplementary material for: Magnetic microporous polymer nanoparticles
Source: Royal Society of Chemistry journal article supplement (doi:10.1039/c2py20999c), 2012-11-28
Supplement: c2py20999c.pdf [file c2py20999c.pdf]

## Support Information

### Magnetic Microporous Polymer Nanoparticles

**Xinjia Yang,<sup>a</sup> Buyi Li,<sup>a</sup> Irfan Majeed,<sup>a</sup> Liyun Liang,<sup>a</sup> Xuejun Long,<sup>b\*</sup> and Bien Tan<sup>a\*</sup>**

Both Xinjia Yang and Buyi Li contributed equally to this work

<sup>a</sup> *School of Chemistry and Chemical Engineering, Huazhong University of Science and Technology, Wuhan, 430074, China.*

*Fax: +86 27 87543632; Tel: +86 27 87558172;*

*E-mail: bien.tan@mail.hust.edu.cn .*

<sup>b</sup> *Engineering Research Center for Clean Production of Textile Printing and Dyeing, Ministry of Education, Wuhan Textile University, Wuhan 430073, P.R. China*

*Email: lelelong528@126.com.*

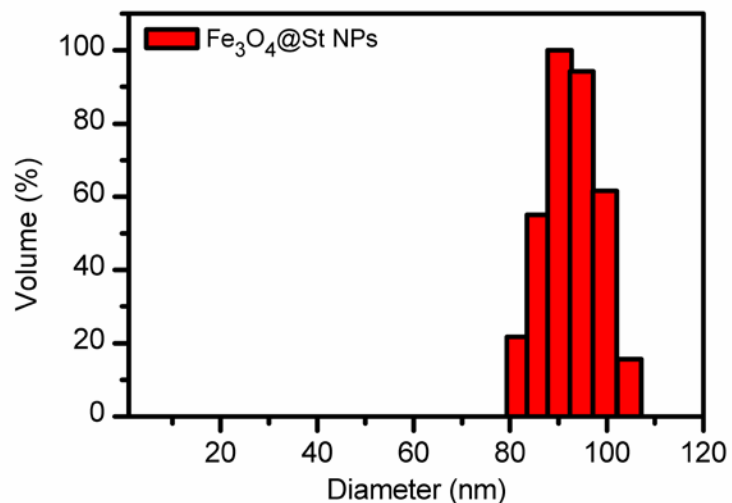

Figure S1 Dynamic Light Scattering (DLS) images of  $\text{Fe}_3\text{O}_4@St$  NPs magnetic precursor nanoparticles.

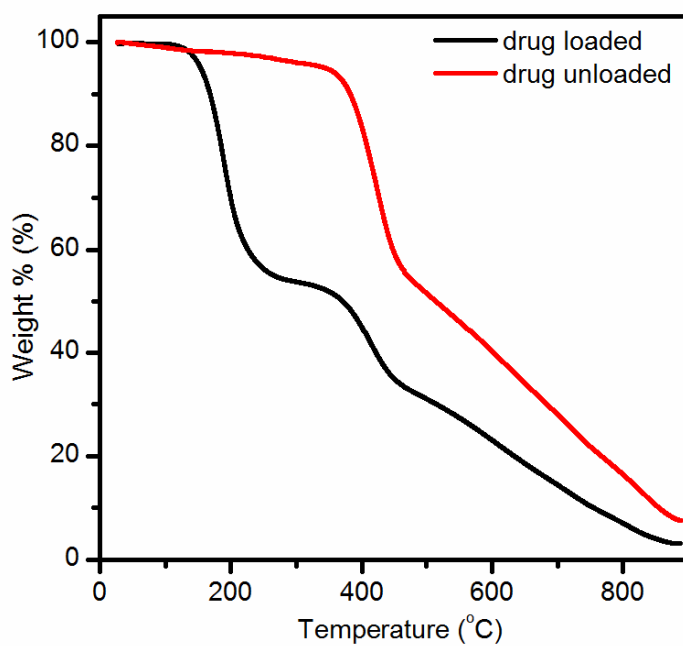

Figure S2 TG under Nitrogen atmosphere of MMPNs without and with drug.

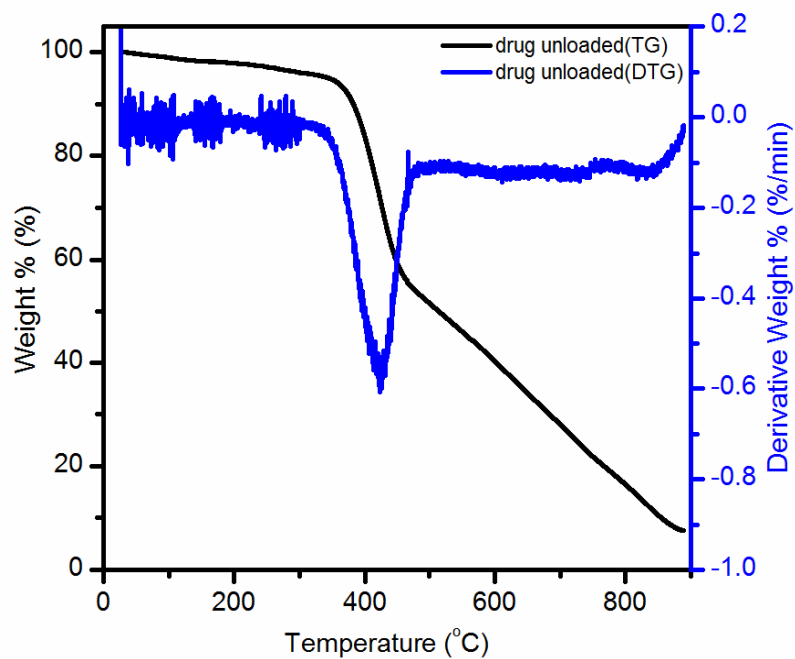

Figure S3 TG and DTG under Nitrogen atmosphere of MMPNs without drug.

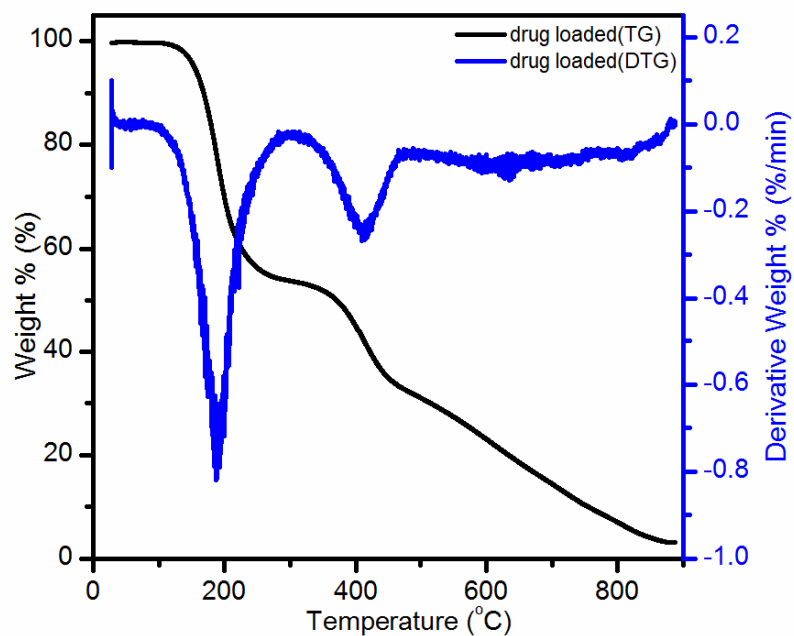

Figure S4 TG and DTG under Nitrogen atmosphere of MMPNs with drug.
